# Supplementary material for: A novel intelligent agent-based framework for appropriate stream selection from perceptive of career counseling
Source: PeerJ journal article supplement (doi:10.7717/peerj-cs.1256), 2023-02-22
Supplement: Survey_Form.pdf [file Survey_Form.pdf]

# A Novel Intelligent Agent-based Framework for Effective Stream Selection: A Career Guidance Perspective – Survey Form

## Demographic variables

|                                               |                                                                                                                                                                                               |
|-----------------------------------------------|-----------------------------------------------------------------------------------------------------------------------------------------------------------------------------------------------|
| Gender                                        | Male<br>Female                                                                                                                                                                                |
| College                                       | Computer and information technology<br>Engineering<br>Education<br>Science and humanities<br>Community college<br>Applied medical sciences<br>Business administration<br>Pharmacy<br>Medicine |
| Field                                         | Science and engineering<br>Health<br>Business<br>Humanity                                                                                                                                     |
| Did they successfully complete all the tasks? | Yes<br>No                                                                                                                                                                                     |

## Tasks rating

| Tasks | Very Hard | Hard | Moderate | Easy | Very Easy |
|-------|-----------|------|----------|------|-----------|
| Task1 |           |      |          |      |           |
| Task2 |           |      |          |      |           |
| Task3 |           |      |          |      |           |
| Task4 |           |      |          |      |           |

## Usability Questions

|                                                          | Strongly agree | Agree | Neutral | Disagree | Strongly disagree |
|----------------------------------------------------------|----------------|-------|---------|----------|-------------------|
| This system was easy for me                              |                |       |         |          |                   |
| The appearance of the system was pleasant                |                |       |         |          |                   |
| I was able to find what I was looking for                |                |       |         |          |                   |
| The information provided by the system is valuable to me |                |       |         |          |                   |
| I was satisfied with the results                         |                |       |         |          |                   |
| The system was useful to discover my career              |                |       |         |          |                   |
